# Supplementary material for: Catch and Release: rare cell analysis from a functionalised medical wire
Source: PubMed Central journal article supplement (PMC5324062; doi:10.1038/srep43424), 2017-02-24
Supplement: srep43424-s1.pdf [file srep43424-s1.pdf]

## **Catch and Release: rare cell analysis from a functionalised medical wire**

Shukun Chen<sup>1</sup>, Amin El-Heliebi<sup>1</sup>, Gerlinde Tauber<sup>2</sup>, Tanja Langsenlehner<sup>2</sup>, Michaela Pötscher<sup>2</sup>, Karl Kashofer<sup>3</sup>, Zbigniew T. Czyż<sup>4</sup>, Bernhard Polzer<sup>4</sup>, Sabine Riethdorf<sup>5</sup>, Andra Kuske<sup>5</sup>, Gerd Leitinger<sup>1</sup>, Klaus Pantel<sup>5</sup>, Thomas Kroneis<sup>1,6\*</sup>, Peter Sedlmayr<sup>1</sup>

1. Institute of Cell Biology, Histology and Embryology, Medical University of Graz, Graz, Austria
2. Department of Therapeutic Radiology and Oncology, Medical University of Graz, Graz, Austria
3. Institute of Pathology, Medical University of Graz, Graz, Austria
4. Fraunhofer Institute for Toxicology and Experimental Medicine ITEM, Regensburg, Germany
5. Department of Tumor Biology, University Medical Center Hamburg-Eppendorf, Hamburg, Germany
6. Sahlgrenska Cancer Center, University of Gothenburg, Gothenburg, Sweden

\*corresponding author: Thomas Kroneis; Harrachgasse 21, 8010 Graz, Austria; tel: +43 (0)316 380 4236; fax: +43 (0)316 380 9625; thomas.kroneis@medunigraz.at

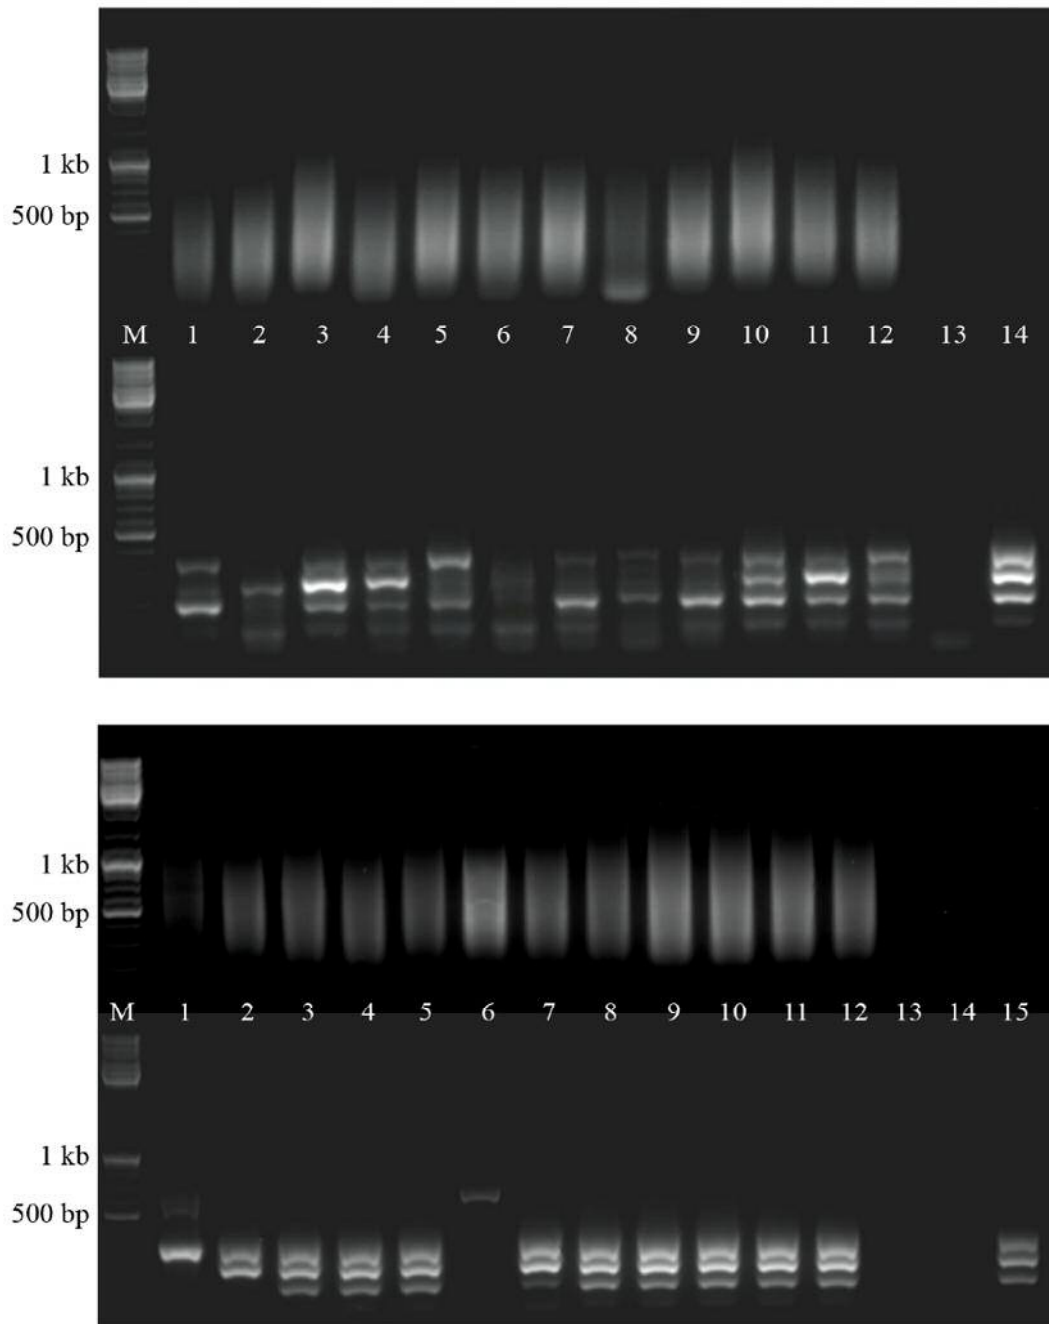

### Supplementary Figure S1

**WGA smears and quality control PCR of single cells amplified by GenomePlex or Ampli1.** To assess the performance of the WGA methods used, we performed 4plex PCR on the amplified single-cell samples. PCR products of this QC-PCR and aliquots of their corresponding WGA templates were run on an agarose gel. WGA smears (range 300 - > 1000 bp; maximum at about 300-500 bp) and the number of positive QC-PCR bands ( $\geq 3$ ) indicated WGA products of good quality. *Upper panel:* #1-8: single cells; #9-12: cell pools (n = 5); #13: negative control; #14: positive control. Samples of #3-5 and #10-12 showed 3 or 4 bands. *Lower panel:* #1-8: single cells; #9-12: cell pools (n = 5); #13 & 14: negative control; #15: positive control. Sample of #3-5 and #7-12 showed 3 or 4 bands; bp: base pairs.

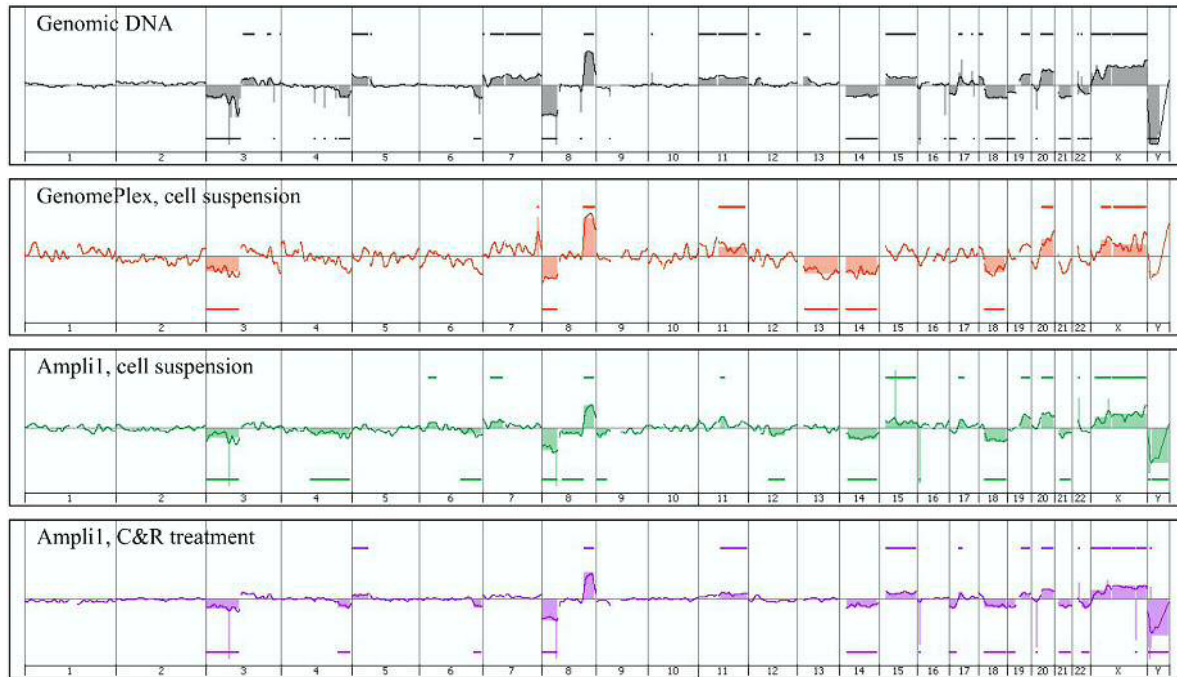

**Supplementary Figure S2 Genome-wide array-CGH profiles of HT-29 cells generated using unamplified gDNA and single cells.** Gains and losses of non-amplified genomic DNA (black), single cell from cell-suspension amplified by GenomePlex (orange), single cell from cell suspension amplified by Ampli1 (green) and single cells recovered from C&R detector amplified by Ampli1 (purple). All samples were co-hybridised with female reference DNA.

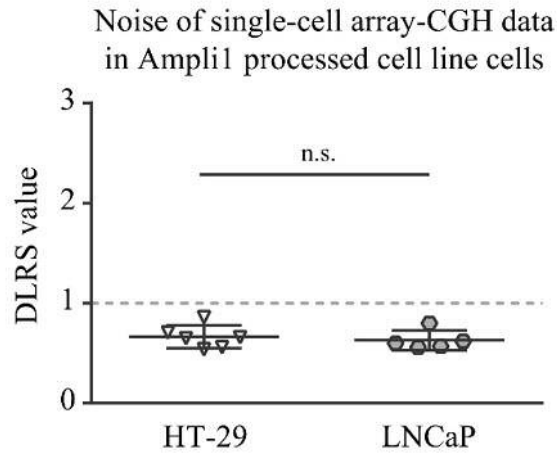

**Supplementary Figure S3 Quality assessment of single cell array-CGH of different cell lines cells post Ampli1 amplification.** Plots of derivative log ratio spread (DLRS) values indicating noisiness in log ratio data of single cells are shown. Using Ampli1, no cell line-specific difference (unpaired *t*-test,  $p = 0.62$ ) was seen at the single-cell level (HT-29 vs. LNCaP). All single cells amplified with Ampli1 have DLRS values  $< 1$  (dashed grey line) indicating these samples to meet the criteria for single-cell array-CGH.

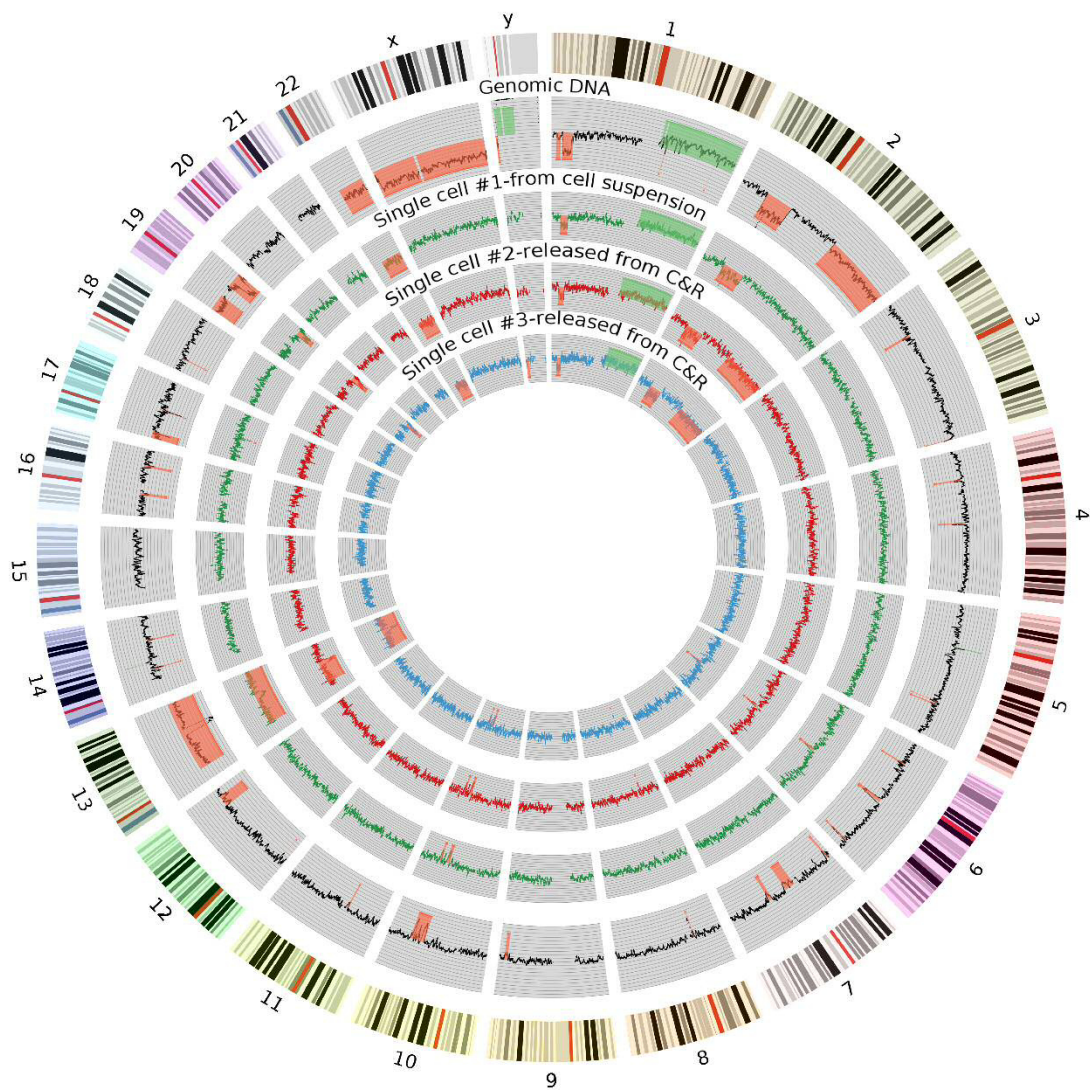

**Supplementary Figure S4 Characterization of genome-wide profile of copy number variations in LNCaP prostate cell line (single-cell WGA: Ampli1).** Circos plot depicting copy number variations in the genome of LNCaP cells. C&R recovered single LNCaP cells were amplified by Ampli1. The outermost ring is the human chromosome ideogram which is oriented pter to qter in a clockwise direction from chromosome 1 to chromosome X (centromeres are shown in red). Other tracks (from outermost to innermost track) represent: non-amplified genomic DNA (black), a single cell sampled from cell suspension by micromanipulation (green), and two single cells (red, blue) recovered from. Centered splines represent a balanced profile; data points above and below represent gains and losses, respectively. Regions of major copy number changes are highlighted in green (gain) or orange (loss). Nota bene: We used female reference DNA for co-hybridisation with the genomic (male) DNA resulting in X-chromosomal loss and a gain in the y-chromosome. For the single-cell hybridisation we used reference DNA obtained from ten male leukocytes that went through two rounds of amplification resulting in balanced sex chromosome profiles.

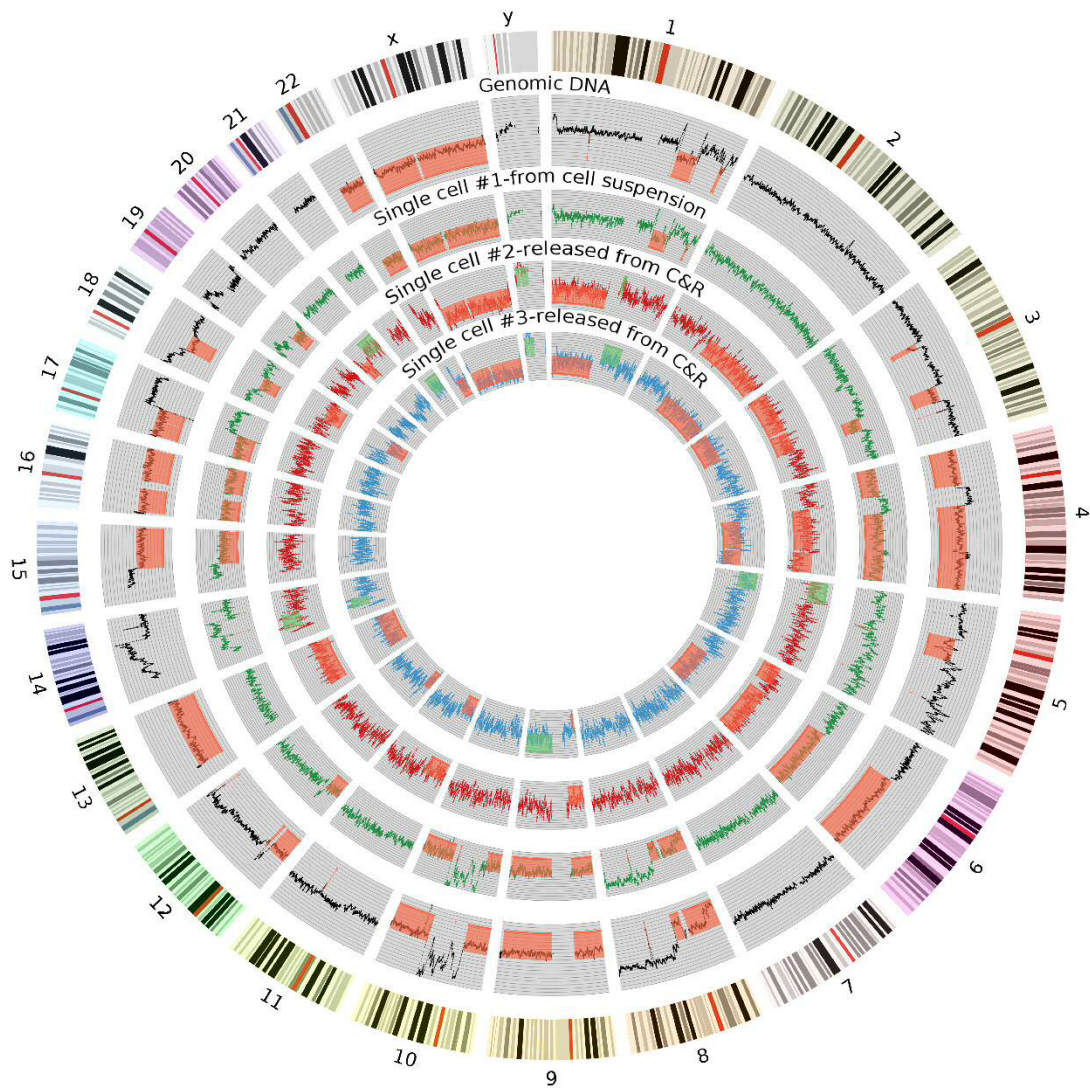

**Supplementary Figure S5 Characterization of genome-wide profile of copy number variations in PC-3 prostate cell line.** Circos plot depicting copy number variations in the genome of PC-3 cells. C&R recovered single PC-3 cells were amplified by GenomePlex. The outermost ring is the human chromosome ideogram which is oriented pter-qter in a clockwise direction from chromosome 1 to chromosome X (centromeres are shown in red). Other tracks (from outermost to innermost track) represent: non-amplified genomic DNA (black), a single cell sampled from cell suspension by micromanipulation (green), and two single cells (red, blue) recovered from. All samples were co-hybridised with female reference DNA. Centered splines represent a balanced profile; data points above and below represent gains and losses, respectively. Regions of major copy number changes are highlighted in green (gain) or orange (loss).

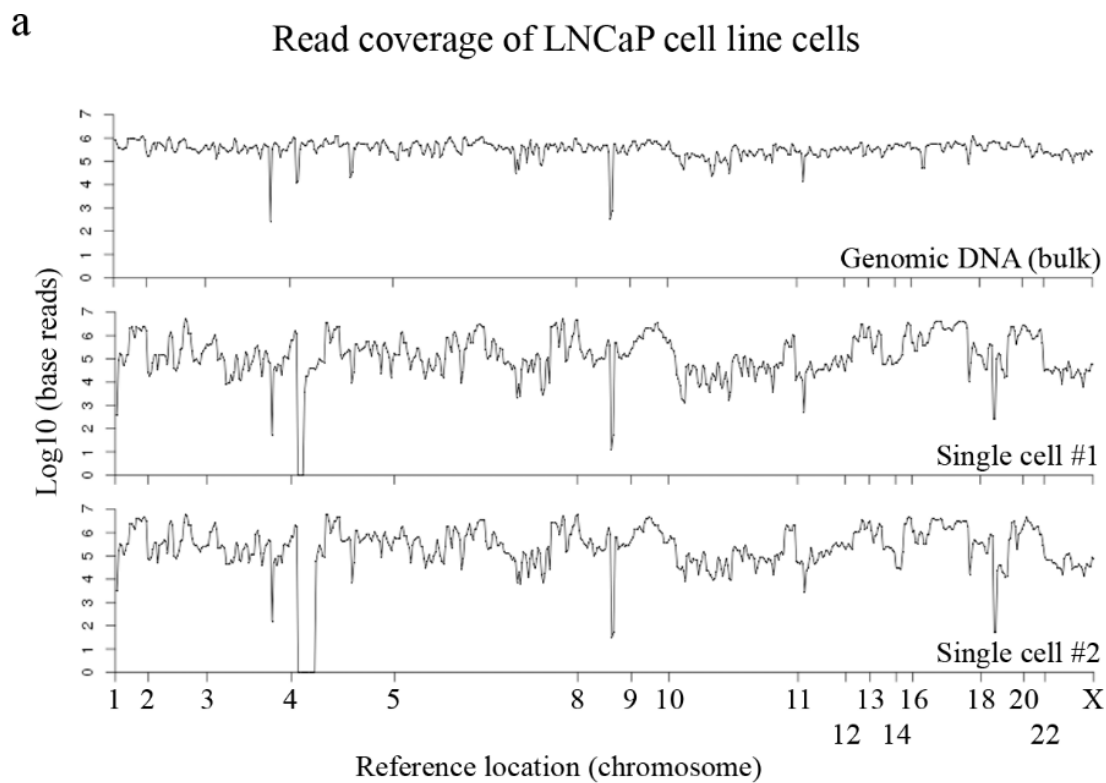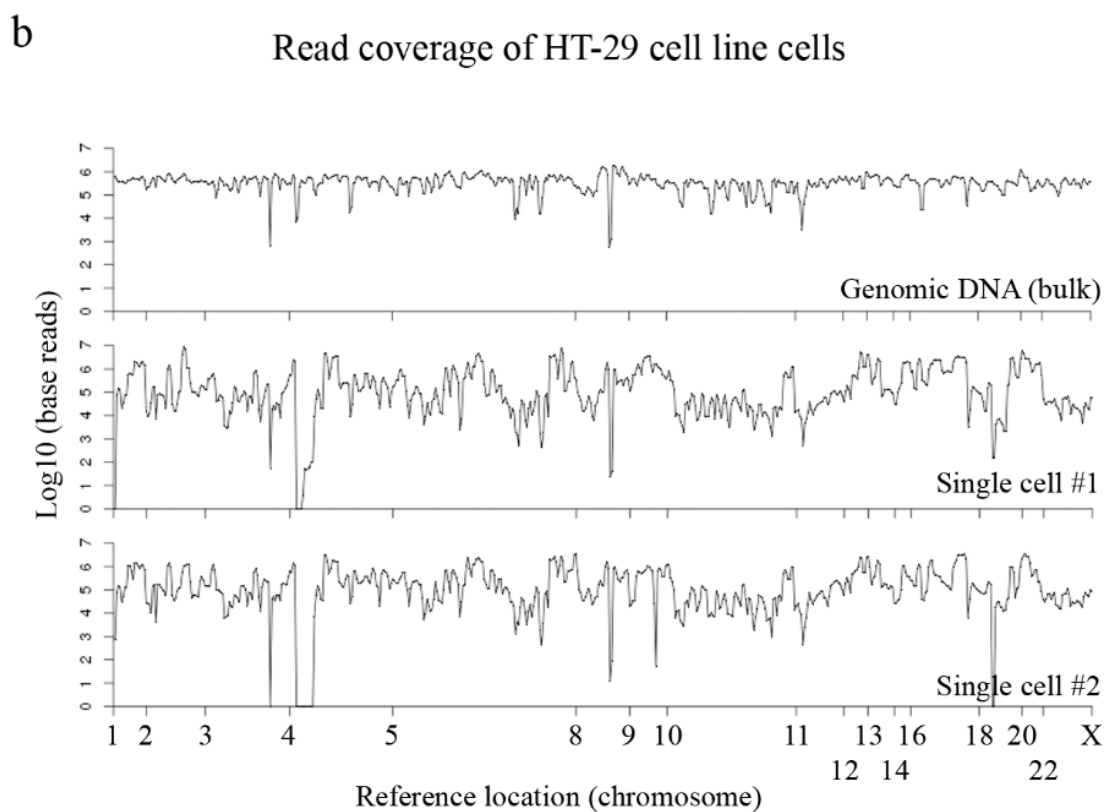

**Supplementary Figure S6 Quality control assessments of recovered single cells for NGS analysis.** Read coverage overview of genomic DNA and two recovered single cells obtained from LNCaP (top) and HT-29 (bottom) cell line, respectively.

**Supplementary Table S1.** Comparison of features between CellCollector DC01 and C&R

| <b>Type</b> | <b>Functional part</b> |                               |                                   | <b>CTC release</b> | <b>Clinical application</b> |
|-------------|------------------------|-------------------------------|-----------------------------------|--------------------|-----------------------------|
|             | Length                 | Antibody-conjugation material | Structure                         |                    |                             |
| DC01        | 2 cm                   | Hydrogel                      | Single wire                       | No                 | Yes (CE certified)          |
| C&R         | 4 cm                   | Polymer                       | Triple wire (helical arrangement) | Yes                | No (in vitro use only)      |



**Supplementary Table S2.** Cells captured and detached from CellCollector C&R

| C&R (#) | Cell line | Spiked cells (#/ml) | Spiking background | Cells on C&R (#) (before detachment) | Cells on C&R (#) (after detachment) | Detached cells (#) | Detachment efficiency (%) |
|---------|-----------|---------------------|--------------------|--------------------------------------|-------------------------------------|--------------------|---------------------------|
| 1       | HT-29     | 100                 | blood              | 88                                   | 36                                  | 52                 | 59                        |
| 2       | HT-29     | 100                 | blood              | 54                                   | 30                                  | 24                 | 44                        |
| 3       | HT-29     | 100                 | blood              | 82                                   | 39                                  | 43                 | 52                        |
| 4       | HT-29     | 100                 | buffer             | 24                                   | 9                                   | 15                 | 63                        |
| 5       | HT-29     | 100                 | buffer             | 32                                   | 11                                  | 21                 | 66                        |
| 6       | HT-29     | 1,000               | blood              | 31                                   | 11                                  | 20                 | 65                        |
| 7       | HT-29     | 1,000               | blood              | 15                                   | 8                                   | 7                  | 47                        |
| 8       | HT-29     | 1,000               | blood              | 28                                   | 7                                   | 21                 | 75                        |
| 9       | HT-29     | 1,000               | buffer             | 39                                   | 6                                   | 33                 | 85                        |
| 10      | HT-29     | 1,000               | buffer             | 71                                   | 24                                  | 47                 | 66                        |
| 11      | HT-29     | 10,000              | blood              | 113                                  | 45                                  | 68                 | 60                        |
| 12      | HT-29     | 10,000              | blood              | 22                                   | 5                                   | 17                 | 77                        |
| 13      | HT-29     | 10,000              | blood              | 7                                    | 1                                   | 6                  | 86                        |
| 14      | HT-29     | 10,000              | buffer             | 20                                   | 8                                   | 12                 | 60                        |
| 15      | HT-29     | 10,000              | buffer             | 72                                   | 12                                  | 60                 | 83                        |
| 16      | HT-29     | 100,000             | buffer             | 117                                  | 8                                   | 109                | 93.2                      |
| 17      | HT-29     | 100,000             | buffer             | 206                                  | 93                                  | 113                | 54.9                      |
| 18      | HT-29     | 100,000             | buffer             | 300                                  | 70                                  | 230                | 76.7                      |
| 19      | HT-29     | 100,000             | buffer             | 256                                  | 23                                  | 233                | 91.0                      |
| 20      | HT-29     | 100,000             | buffer             | 393                                  | 36                                  | 357                | 90.8                      |

|    |       |         |        |     |    |     |      |
|----|-------|---------|--------|-----|----|-----|------|
| 21 | LNCaP | 100,000 | buffer | 74  | 27 | 47  | 64   |
| 22 | LNCaP | 100,000 | buffer | 142 | 34 | 108 | 76.1 |
| 23 | LNCaP | 100,000 | buffer | 505 | 36 | 469 | 92.9 |
| 24 | LNCaP | 100,000 | buffer | 724 | 91 | 633 | 87.4 |
| 25 | LNCaP | 100,000 | buffer | 754 | 80 | 674 | 89.4 |
| 26 | LNCaP | 100,000 | buffer | 79  | 18 | 61  | 77   |

**Supplementary Tab. S3.** Details of gains and losses (Mb) detected in single HT-29 cells (array-CGH) – sorted according to location within genome

| Chromosome # | Cytoband       | Aberration |           |             | Sample |        |           |                         | Amplification method |
|--------------|----------------|------------|-----------|-------------|--------|--------|-----------|-------------------------|----------------------|
|              |                | Start      | Stop      | # of probes | Amp    | Del    | size (Mb) | (# of cell/genomic DNA) |                      |
| chr01        | p36.33 - p34.1 | 1179223    | 45580317  | 1046        | 0.000  | -0.292 | 44.4      | 7                       | Ampli1               |
| chr01        | p36.12 - p13.2 | 22837102   | 114149968 | 1887        | 0.497  | 0.000  | 91.3      | 4                       | GenomePlex           |
| chr01        | p12            | 118214256  | 118303912 | 6           | 2.588  | 0.000  | 0.1       | 7                       | Ampli1               |
| chr01        | q21.1 - q44    | 143639135  | 247179291 | 2247        | 0.748  | 0.000  | 103.5     | 4                       | GenomePlex           |
| chr01        | q21.1 - q23.2  | 143720878  | 158725456 | 444         | 0.000  | -0.354 | 15.0      | 10                      | Ampli1               |
| chr01        | q21.2 - q21.3  | 148125527  | 153211494 | 194         | 0.000  | -0.518 | 5.1       | 7                       | Ampli1               |
| chr01        | q21.3          | 153214463  | 153217477 | 3           | 3.378  | 0.000  | 0.0       | 7                       | Ampli1               |
| chr01        | q31.1          | 185882529  | 186223322 | 4           | 2.962  | 0.000  | 0.3       | 7                       | Ampli1               |
| chr01        | q42.12         | 223669592  | 224099906 | 10          | 5.344  | 0.000  | 0.4       | 4                       | GenomePlex           |
| chr02        | p22.3          | 35213098   | 35361530  | 5           | 2.724  | 0.000  | 0.1       | 7                       | Ampli1               |
| chr02        | p16.3 - p15    | 48768816   | 61576198  | 206         | 0.547  | 0.000  | 12.8      | 7                       | Ampli1               |
| chr02        | p16.3          | 50247461   | 50746410  | 10          | 2.691  | 0.000  | 0.5       | 7                       | Ampli1               |
| chr02        | p12            | 78199429   | 78768383  | 8           | 2.508  | 0.000  | 0.6       | 7                       | Ampli1               |
| chr02        | q21.2          | 133925196  | 134018942 | 3           | 0.000  | -4.621 | 0.1       | 9                       | Ampli1               |
| chr02        | q21.3 - q35    | 136198965  | 215281055 | 1392        | 0.427  | 0.000  | 79.1      | 7                       | Ampli1               |
| chr02        | q31.1          | 175450840  | 175711131 | 7           | 3.087  | 0.000  | 0.3       | 7                       | Ampli1               |
| chr02        | q36.3 - q37.1  | 227041180  | 230975907 | 77          | 0.657  | 0.000  | 3.9       | 7                       | Ampli1               |
| chr03        | p26.3 - p11.1  | 187711     | 89612764  | 1653        | 0.000  | -1.210 | 89.4      | 1                       | GenomePlex           |
| chr03        | p26.3 - p11.1  | 187711     | 89920060  | 1656        | 0.000  | -0.433 | 89.7      | 6                       | Ampli1               |
| chr03        | p26.3 - p11.1  | 245649     | 89473737  | 1649        | 0.000  | -0.383 | 89.2      | 5                       | Ampli1               |
| chr03        | p26.3 - p11.1  | 345339     | 90336752  | 1657        | 0.000  | -0.407 | 90.0      | 9                       | Ampli1               |
| chr03        | p26.3 - p11.1  | 1276800    | 90336752  | 1644        | 0.000  | -0.727 | 89.1      | 3                       | GenomePlex           |
| chr03        | p26.3 - p11.1  | 1312273    | 89768983  | 1638        | 0.000  | -0.453 | 88.5      | 8                       | Ampli1               |
| chr03        | p26.3 - p24.3  | 1312273    | 17275073  | 306         | 0.000  | -0.450 | 16.0      | 7                       | Ampli1               |
| chr03        | p26.3 - p11.1  | 1415081    | 90102363  | 1638        | 0.000  | -0.627 | 88.7      | gDNA                    | n.a.                 |
| chr03        | p26.3 - p11.1  | 1651376    | 90336752  | 1637        | 0.000  | -0.733 | 88.7      | 2                       | GenomePlex           |
| chr03        | p26.3 - p11.1  | 2937570    | 89768983  | 1610        | 0.000  | -0.467 | 86.8      | 10                      | Ampli1               |
| chr03        | p24.2          | 24564676   | 25272714  | 10          | 1.825  | 0.000  | 0.7       | 5                       | Ampli1               |
| chr03        | p24.2          | 24721899   | 25272714  | 9           | 2.433  | 0.000  | 0.6       | 7                       | Ampli1               |

| Chromosome # | Cytoband       | Aberration |           |             | Sample |        |           | Amplification method |                         |
|--------------|----------------|------------|-----------|-------------|--------|--------|-----------|----------------------|-------------------------|
|              |                | Start      | Stop      | # of probes | Amp    | Del    | size (Mb) |                      | (# of cell/genomic DNA) |
| chr03        | p24.2          | 24980387   | 25135367  | 3           | 0.000  | -0.835 | 0.2       | 7                    | Ampli1                  |
| chr03        | p24.1          | 27826052   | 28227816  | 3           | 3.345  | 0.000  | 0.4       | 7                    | Ampli1                  |
| chr03        | p22.2 - p11.1  | 37384650   | 89473737  | 1029        | 0.000  | -0.519 | 52.1      | 7                    | Ampli1                  |
| chr03        | p21.32 - p14.2 | 44440141   | 58626285  | 437         | 0.000  | -0.458 | 14.2      | gDNA                 | n.a.                    |
| chr03        | p14.2          | 59866479   | 60703624  | 21          | 0.000  | -2.321 | 0.8       | 7                    | Ampli1                  |
| chr03        | p14.2          | 59901193   | 60215556  | 10          | 0.000  | -1.605 | 0.3       | gDNA                 | n.a.                    |
| chr03        | p14.2          | 60267262   | 60604904  | 8           | 0.000  | -5.938 | 0.3       | gDNA                 | n.a.                    |
| chr03        | p14.2          | 60267262   | 60604904  | 8           | 0.000  | -4.112 | 0.3       | 5                    | Ampli1                  |
| chr03        | p14.2          | 60267262   | 60604904  | 8           | 0.000  | -4.849 | 0.3       | 6                    | Ampli1                  |
| chr03        | p14.2          | 60267262   | 60604904  | 8           | 0.000  | -4.148 | 0.3       | 8                    | Ampli1                  |
| chr03        | p14.2          | 60267262   | 60604904  | 8           | 0.000  | -4.461 | 0.3       | 9                    | Ampli1                  |
| chr03        | p14.2          | 60267262   | 60604904  | 8           | 0.000  | -3.777 | 0.3       | 10                   | Ampli1                  |
| chr03        | p14.2          | 60659263   | 60916944  | 7           | 0.000  | -1.691 | 0.3       | gDNA                 | n.a.                    |
| chr03        | p14.1          | 65438127   | 65632696  | 5           | 0.000  | -1.584 | 0.2       | gDNA                 | n.a.                    |
| chr03        | p12.3 - p11.1  | 79550595   | 89473737  | 108         | 0.000  | -1.546 | 9.9       | gDNA                 | n.a.                    |
| chr03        | p12.2          | 82622792   | 83271792  | 7           | 0.000  | -0.553 | 0.6       | gDNA                 | n.a.                    |
| chr03        | q11.2 - q26.31 | 95263583   | 176491303 | 1449        | 0.256  | 0.000  | 81.2      | 10                   | Ampli1                  |
| chr03        | q11.2 - q29    | 95613257   | 193919798 | 1766        | 0.367  | 0.000  | 98.3      | 7                    | Ampli1                  |
| chr03        | q11.2 - q21.3  | 99151488   | 130338873 | 590         | 0.379  | 0.000  | 31.2      | 9                    | Ampli1                  |
| chr03        | q11.2 - q22.1  | 99651232   | 132096886 | 616         | 0.349  | 0.000  | 32.4      | gDNA                 | n.a.                    |
| chr03        | q12.2          | 102175540  | 102410841 | 3           | 3.787  | 0.000  | 0.2       | 7                    | Ampli1                  |
| chr03        | q24 - q25.2    | 147266685  | 154715342 | 134         | 1.112  | 0.000  | 7.4       | 7                    | Ampli1                  |
| chr03        | q26.1 - q26.31 | 164616150  | 176491303 | 203         | 0.390  | 0.000  | 11.9      | gDNA                 | n.a.                    |
| chr03        | q26.33         | 181148809  | 181382033 | 6           | 0.000  | -0.839 | 0.2       | gDNA                 | n.a.                    |
| chr03        | q29            | 197118367  | 199288217 | 60          | 0.284  | 0.000  | 2.2       | gDNA                 | n.a.                    |
| chr04        | p14            | 35612319   | 37803119  | 37          | 0.968  | 0.000  | 2.2       | 7                    | Ampli1                  |
| chr04        | q13.2          | 68288073   | 68543744  | 8           | 2.591  | 0.000  | 0.3       | 7                    | Ampli1                  |
| chr04        | q21.21 - q35.1 | 81124287   | 186681608 | 1688        | 0.000  | -0.314 | 105.6     | 6                    | Ampli1                  |
| chr04        | q22.1          | 91471385   | 91979910  | 15          | 0.000  | -0.874 | 0.5       | gDNA                 | n.a.                    |
| chr04        | q26            | 118827701  | 119194329 | 4           | 0.000  | -1.116 | 0.4       | gDNA                 | n.a.                    |
| chr04        | q31.1 - q31.21 | 141396594  | 142269348 | 20          | 1.616  | 0.000  | 0.9       | 7                    | Ampli1                  |

| Chromosome # | Cytoband        | Aberration |           |             | Sample |        |           | Amplification method |                         |
|--------------|-----------------|------------|-----------|-------------|--------|--------|-----------|----------------------|-------------------------|
|              |                 | Start      | Stop      | # of probes | Amp    | Del    | size (Mb) |                      | (# of cell/genomic DNA) |
| chr04        | q31.22 - q31.23 | 147264214  | 150112334 | 59          | 0.000  | -0.630 | 2.8       | gDNA                 | n.a.                    |
| chr04        | q31.3           | 151576229  | 151723192 | 4           | 3.708  | 0.000  | 0.1       | 7                    | Ampli1                  |
| chr04        | q31.3 - q32.1   | 154725220  | 155378202 | 12          | 2.431  | 0.000  | 0.7       | 7                    | Ampli1                  |
| chr04        | q32.1 - q35.2   | 155881609  | 187505073 | 498         | 0.000  | -0.398 | 31.6      | 8                    | Ampli1                  |
| chr04        | q32.1 - q35.2   | 156851091  | 189249479 | 510         | 0.000  | -0.464 | 32.4      | 9                    | Ampli1                  |
| chr04        | q32.1 - q35.2   | 157060447  | 187691464 | 478         | 0.000  | -0.592 | 30.6      | gDNA                 | n.a.                    |
| chr04        | q32.1 - q35.2   | 157480785  | 187505073 | 472         | 0.000  | -0.331 | 30.0      | 10                   | Ampli1                  |
| chr04        | q32.3           | 170010519  | 170056227 | 3           | 3.303  | 0.000  | 0.0       | 7                    | Ampli1                  |
| chr04        | q34.1 - q35.1   | 174696391  | 184073766 | 117         | 0.000  | -0.602 | 9.4       | 7                    | Ampli1                  |
| chr04        | q34.1 - q35.1   | 174766913  | 184423869 | 121         | 0.000  | -0.582 | 9.7       | 5                    | Ampli1                  |
| chr04        | q35.1           | 183484605  | 183760601 | 7           | 0.000  | -1.506 | 0.3       | gDNA                 | n.a.                    |
| chr04        | q35.1           | 184737019  | 184843006 | 4           | 3.887  | 0.000  | 0.1       | 7                    | Ampli1                  |
| chr05        | p15.33 - p12    | 204737     | 45376406  | 641         | 0.407  | 0.000  | 45.2      | gDNA                 | n.a.                    |
| chr05        | p15.33 - p11    | 1227543    | 46136124  | 632         | 0.272  | 0.000  | 44.9      | 8                    | Ampli1                  |
| chr05        | p15.33 - p11    | 1597400    | 46136124  | 625         | 0.354  | 0.000  | 44.5      | 10                   | Ampli1                  |
| chr05        | p15.33 - p13.1  | 2265049    | 40668360  | 522         | 0.473  | 0.000  | 38.4      | 7                    | Ampli1                  |
| chr05        | p15.33 - p12    | 4216847    | 45681293  | 586         | 0.274  | 0.000  | 41.5      | 5                    | Ampli1                  |
| chr05        | p13.2           | 36644850   | 36691596  | 3           | 3.708  | 0.000  | 0.0       | 7                    | Ampli1                  |
| chr05        | q11.1 - q11.2   | 49725929   | 53506747  | 52          | 0.452  | 0.000  | 3.8       | gDNA                 | n.a.                    |
| chr05        | q21.1           | 99300776   | 100401951 | 17          | 1.799  | 0.000  | 1.1       | 7                    | Ampli1                  |
| chr05        | q23.2 - q23.3   | 126918464  | 127878707 | 19          | 1.566  | 0.000  | 1.0       | 7                    | Ampli1                  |
| chr05        | q31.2 - q35.3   | 138080491  | 177567235 | 773         | 0.620  | 0.000  | 39.5      | 4                    | GenomePlex              |
| chr06        | p22.3           | 20542602   | 22293983  | 33          | 1.432  | 0.000  | 1.8       | 7                    | Ampli1                  |
| chr06        | p22.1 - p12.3   | 26232334   | 47821490  | 663         | 0.311  | 0.000  | 21.6      | 6                    | Ampli1                  |
| chr06        | p22.1 - p12.3   | 26232334   | 47278590  | 652         | 0.295  | 0.000  | 21.0      | 9                    | Ampli1                  |
| chr06        | p21.33 - p21.2  | 30146240   | 37957830  | 298         | 0.796  | 0.000  | 7.8       | 4                    | GenomePlex              |
| chr06        | p21.2           | 38653366   | 39047545  | 9           | 2.390  | 0.000  | 0.4       | 7                    | Ampli1                  |
| chr06        | p12.3 - p11.2   | 46220052   | 57620687  | 200         | 0.714  | 0.000  | 11.4      | 7                    | Ampli1                  |
| chr06        | q11.1 - q21     | 62448434   | 105555714 | 622         | 0.593  | 0.000  | 43.1      | 7                    | Ampli1                  |
| chr06        | q12 - q27       | 65760879   | 170700061 | 1737        | 0.000  | -0.657 | 104.9     | 1                    | GenomePlex              |
| chr06        | q12 - q13       | 66761677   | 73135665  | 94          | 1.252  | 0.000  | 6.4       | 7                    | Ampli1                  |

| Chromosome # | Cytoband        | Aberration |           |             | Sample |        |           | Amplification method |                         |
|--------------|-----------------|------------|-----------|-------------|--------|--------|-----------|----------------------|-------------------------|
|              |                 | Start      | Stop      | # of probes | Amp    | Del    | size (Mb) |                      | (# of cell/genomic DNA) |
| chr06        | q12 - q14.1     | 66761677   | 80772362  | 214         | 0.426  | 0.000  | 14.0      | 5                    | Ampli1                  |
| chr06        | q21 - q27       | 113248229  | 170732033 | 1001        | 0.000  | -0.280 | 57.5      | 6                    | Ampli1                  |
| chr06        | q23.3 - q24.1   | 138942686  | 139107955 | 3           | 4.495  | 0.000  | 0.2       | 7                    | Ampli1                  |
| chr06        | q24.3 - q27     | 147702163  | 169970658 | 396         | 0.000  | -0.386 | 22.3      | 9                    | Ampli1                  |
| chr06        | q24.3 - q27     | 147747964  | 170732033 | 407         | 0.000  | -0.576 | 23.0      | gDNA                 | n.a.                    |
| chr06        | q24.3 - q27     | 147747964  | 170732033 | 407         | 0.000  | -0.405 | 23.0      | 8                    | Ampli1                  |
| chr06        | q24.3 - q27     | 147867199  | 170631711 | 402         | 0.000  | -0.419 | 22.8      | 10                   | Ampli1                  |
| chr06        | q24.3 - q27     | 148262568  | 167463414 | 345         | 0.000  | -0.414 | 19.2      | 5                    | Ampli1                  |
| chr06        | q25.2 - q26     | 153387113  | 163699406 | 183         | 0.000  | -0.592 | 10.3      | 7                    | Ampli1                  |
| chr06        | q26             | 161798317  | 162090585 | 6           | 0.000  | -1.421 | 0.3       | gDNA                 | n.a.                    |
| chr06        | q27             | 164493893  | 165613516 | 8           | 2.142  | 0.000  | 1.1       | 7                    | Ampli1                  |
| chr07        | p22.3 - p21.3   | 187615     | 7365933   | 132         | 0.542  | 0.000  | 7.2       | gDNA                 | n.a.                    |
| chr07        | p22.3 - p11.1   | 731447     | 57498383  | 1005        | 0.357  | 0.000  | 56.8      | 5                    | Ampli1                  |
| chr07        | p22.2           | 3455014    | 3795836   | 8           | 2.381  | 0.000  | 0.3       | 7                    | Ampli1                  |
| chr07        | p22.1 - p11.1   | 7010835    | 57498383  | 886         | 0.538  | 0.000  | 50.5      | 7                    | Ampli1                  |
| chr07        | p21.3           | 11720901   | 11844417  | 4           | 4.075  | 0.000  | 0.1       | 7                    | Ampli1                  |
| chr07        | p15.3 - p11.2   | 20960167   | 56534393  | 663         | 0.372  | 0.000  | 35.6      | 6                    | Ampli1                  |
| chr07        | p15.3 - p11.1   | 21423817   | 57498383  | 664         | 0.383  | 0.000  | 36.1      | gDNA                 | n.a.                    |
| chr07        | p15.3 - p15.2   | 23537059   | 26215681  | 45          | 1.491  | 0.000  | 2.7       | 7                    | Ampli1                  |
| chr07        | p15.2 - p11.2   | 26371173   | 56125662  | 555         | 0.297  | 0.000  | 29.8      | 9                    | Ampli1                  |
| chr07        | p15.1           | 28070134   | 28270994  | 5           | 3.095  | 0.000  | 0.2       | 7                    | Ampli1                  |
| chr07        | q11.21 - q36.3  | 62153588   | 158781397 | 2065        | 0.393  | 0.000  | 96.6      | gDNA                 | n.a.                    |
| chr07        | q11.21 - q21.11 | 62471018   | 77484115  | 242         | 0.537  | 0.000  | 15.0      | gDNA                 | n.a.                    |
| chr07        | q11.21 - q36.3  | 62471018   | 158291970 | 2054        | 0.895  | 0.000  | 95.8      | 1                    | GenomePlex              |
| chr07        | q11.23 - q36.1  | 76038093   | 148961160 | 1631        | 0.481  | 0.000  | 72.9      | 7                    | Ampli1                  |
| chr07        | q11.23 - q21.11 | 77260956   | 77728565  | 12          | 1.845  | 0.000  | 0.5       | 5                    | Ampli1                  |
| chr07        | q11.23 - q21.11 | 77260956   | 77728565  | 12          | 2.949  | 0.000  | 0.5       | 7                    | Ampli1                  |
| chr07        | q21.12          | 86663788   | 87010243  | 9           | 2.895  | 0.000  | 0.3       | 7                    | Ampli1                  |
| chr07        | q22.1           | 99500188   | 102343182 | 99          | 0.597  | 0.000  | 2.8       | gDNA                 | n.a.                    |
| chr07        | q22.3 - q31.1   | 106624587  | 107760886 | 30          | 1.678  | 0.000  | 1.1       | 7                    | Ampli1                  |
| chr07        | q31.1 - q31.33  | 108944653  | 126890763 | 411         | 0.252  | 0.000  | 17.9      | gDNA                 | n.a.                    |

| Chromosome # | Cytoband        | Aberration |           |             | Sample |        |           | Amplification method |                         |
|--------------|-----------------|------------|-----------|-------------|--------|--------|-----------|----------------------|-------------------------|
|              |                 | Start      | Stop      | # of probes | Amp    | Del    | size (Mb) |                      | (# of cell/genomic DNA) |
| chr07        | q31.1           | 111593091  | 111638854 | 3           | 4.621  | 0.000  | 0.0       | 7                    | Ampli1                  |
| chr07        | q31.2 - q31.33  | 116657223  | 126811276 | 232         | 0.960  | 0.000  | 10.2      | 7                    | Ampli1                  |
| chr07        | q35             | 144211503  | 144369910 | 4           | 3.353  | 0.000  | 0.2       | 7                    | Ampli1                  |
| chr07        | q35 - q36.1     | 146519789  | 150695992 | 110         | 2.087  | 0.000  | 4.2       | 3                    | GenomePlex              |
| chr07        | q35 - q36.2     | 147314780  | 152396086 | 128         | 0.696  | 0.000  | 5.1       | gDNA                 | n.a.                    |
| chr08        | p23.3 - p11.1   | 211611     | 43452795  | 783         | 0.000  | -1.435 | 43.2      | gDNA                 | n.a.                    |
| chr08        | p23.3 - p11.1   | 211611     | 43291296  | 781         | 0.000  | -1.873 | 43.1      | 1                    | GenomePlex              |
| chr08        | p23.3 - p11.1   | 211611     | 43452795  | 783         | 0.000  | -1.106 | 43.2      | 3                    | GenomePlex              |
| chr08        | p23.3 - p11.1   | 211611     | 43229710  | 780         | 0.000  | -1.105 | 43.0      | 6                    | Ampli1                  |
| chr08        | p23.3 - p11.1   | 211611     | 43452795  | 783         | 0.000  | -1.202 | 43.2      | 7                    | Ampli1                  |
| chr08        | p23.3 - p11.1   | 211611     | 43452795  | 783         | 0.000  | -1.070 | 43.2      | 8                    | Ampli1                  |
| chr08        | p23.3 - p11.1   | 211611     | 43452795  | 783         | 0.000  | -1.100 | 43.2      | 10                   | Ampli1                  |
| chr08        | p23.3 - p11.1   | 283177     | 43452795  | 782         | 0.000  | -1.324 | 43.2      | 2                    | GenomePlex              |
| chr08        | p23.3 - p11.1   | 283177     | 43452795  | 782         | 0.000  | -1.065 | 43.2      | 5                    | Ampli1                  |
| chr08        | p23.3 - p11.1   | 760001     | 43229710  | 773         | 0.000  | -0.997 | 42.5      | 9                    | Ampli1                  |
| chr08        | p23.1           | 8721996    | 8929171   | 4           | 3.046  | 0.000  | 0.2       | 7                    | Ampli1                  |
| chr08        | p11.23 - p11.22 | 39378051   | 39505315  | 4           | 0.000  | -5.389 | 0.1       | gDNA                 | n.a.                    |
| chr08        | p11.23 - p11.22 | 39428746   | 39505315  | 3           | 0.000  | -5.249 | 0.1       | 5                    | Ampli1                  |
| chr08        | p11.23 - p11.22 | 39428746   | 39505315  | 3           | 0.000  | -6.483 | 0.1       | 6                    | Ampli1                  |
| chr08        | p11.23 - p11.22 | 39428746   | 39505315  | 3           | 0.000  | -5.269 | 0.1       | 7                    | Ampli1                  |
| chr08        | p11.23 - p11.22 | 39428746   | 39505315  | 3           | 0.000  | -5.314 | 0.1       | 8                    | Ampli1                  |
| chr08        | p11.23 - p11.22 | 39428746   | 39505315  | 3           | 0.000  | -5.847 | 0.1       | 9                    | Ampli1                  |
| chr08        | q11.23 - q24.3  | 54642612   | 146031777 | 1525        | 0.604  | 0.000  | 91.4      | 4                    | GenomePlex              |
| chr08        | q12.1 - q23.3   | 55835709   | 114702528 | 971         | 0.000  | -0.300 | 58.9      | 6                    | Ampli1                  |
| chr08        | q21.11          | 77282375   | 77538921  | 3           | 5.562  | 0.000  | 0.3       | 7                    | Ampli1                  |
| chr08        | q22.3 - q23.1   | 105505760  | 107630371 | 33          | 0.000  | -1.336 | 2.1       | gDNA                 | n.a.                    |
| chr08        | q23.3 - q24.3   | 113972147  | 145986541 | 545         | 2.029  | 0.000  | 32.0      | 3                    | GenomePlex              |
| chr08        | q23.3 - q24.3   | 114387099  | 142694213 | 444         | 2.386  | 0.000  | 28.3      | 2                    | GenomePlex              |
| chr08        | q23.3 - q24.3   | 115354884  | 142694213 | 437         | 1.641  | 0.000  | 27.3      | gDNA                 | n.a.                    |
| chr08        | q23.3 - q24.3   | 115354884  | 142838160 | 439         | 2.536  | 0.000  | 27.5      | 1                    | GenomePlex              |
| chr08        | q23.3 - q24.3   | 115354884  | 142694213 | 437         | 1.182  | 0.000  | 27.3      | 5                    | Ampli1                  |

| Chromosome # | Cytoband        | Aberration |           |             | Sample |        |           | Amplification method |                         |
|--------------|-----------------|------------|-----------|-------------|--------|--------|-----------|----------------------|-------------------------|
|              |                 | Start      | Stop      | # of probes | Amp    | Del    | size (Mb) |                      | (# of cell/genomic DNA) |
| chr08        | q23.3 - q24.3   | 115354884  | 143280752 | 447         | 1.159  | 0.000  | 27.9      | 6                    | Ampli1                  |
| chr08        | q23.3 - q24.3   | 115354884  | 142694213 | 437         | 1.326  | 0.000  | 27.3      | 8                    | Ampli1                  |
| chr08        | q23.3 - q24.3   | 115354884  | 143333332 | 448         | 1.297  | 0.000  | 28.0      | 9                    | Ampli1                  |
| chr08        | q23.3 - q24.3   | 115354884  | 142694213 | 437         | 1.340  | 0.000  | 27.3      | 10                   | Ampli1                  |
| chr08        | q23.3 - q24.3   | 115499813  | 142694213 | 436         | 1.264  | 0.000  | 27.2      | 7                    | Ampli1                  |
| chr09        | p24.3 - p21.1   | 1793603    | 30800291  | 450         | 0.000  | -0.368 | 29.0      | 6                    | Ampli1                  |
| chr09        | p21.3           | 21321182   | 21374442  | 4           | 3.846  | 0.000  | 0.1       | 7                    | Ampli1                  |
| chr09        | p21.1 - p13.1   | 32446057   | 39146954  | 166         | 0.000  | -0.469 | 6.7       | 7                    | Ampli1                  |
| chr09        | p13.3 - p13.1   | 34075974   | 39146954  | 128         | 0.000  | -0.447 | 5.1       | 10                   | Ampli1                  |
| chr09        | p13.3 - p13.1   | 36090483   | 39146954  | 59          | 0.000  | -0.557 | 3.1       | gDNA                 | n.a.                    |
| chr09        | q21.11 - q21.12 | 72395705   | 72744315  | 10          | 2.081  | 0.000  | 0.3       | 7                    | Ampli1                  |
| chr09        | q32 - q34.3     | 114079223  | 140128736 | 632         | 0.000  | -0.398 | 26.0      | 7                    | Ampli1                  |
| chr09        | q33.3 - q34.3   | 129251335  | 140128736 | 306         | 0.366  | 0.000  | 10.9      | 9                    | Ampli1                  |
| chr10        | p14             | 11690026   | 12111084  | 11          | 0.656  | 0.000  | 0.4       | gDNA                 | n.a.                    |
| chr10        | p12.2 - p11.21  | 23081808   | 34755676  | 226         | 0.439  | 0.000  | 11.7      | 7                    | Ampli1                  |
| chr10        | q11.23 - q21.1  | 51736811   | 57140296  | 90          | 1.083  | 0.000  | 5.4       | 7                    | Ampli1                  |
| chr10        | q21.3 - q26.11  | 68649437   | 119795433 | 1037        | 0.657  | 0.000  | 51.1      | 4                    | GenomePlex              |
| chr10        | q23.1 - q24.31  | 83868587   | 102695235 | 398         | 0.369  | 0.000  | 18.8      | 7                    | Ampli1                  |
| chr10        | q23.33          | 95547420   | 95657839  | 4           | 3.315  | 0.000  | 0.1       | 7                    | Ampli1                  |
| chr11        | p15.5 - p11.12  | 208365     | 51289318  | 970         | 0.341  | 0.000  | 51.1      | gDNA                 | n.a.                    |
| chr11        | p15.5 - p11.12  | 303837     | 50188486  | 965         | 0.458  | 0.000  | 49.9      | 4                    | GenomePlex              |
| chr11        | p15.3 - p12     | 10741917   | 42063359  | 534         | 0.318  | 0.000  | 31.3      | 7                    | Ampli1                  |
| chr11        | q11 - q24.3     | 54866623   | 128399315 | 1663        | 0.488  | 0.000  | 73.5      | 3                    | GenomePlex              |
| chr11        | q11 - q25       | 54866623   | 133720992 | 1771        | 0.274  | 0.000  | 78.9      | 5                    | Ampli1                  |
| chr11        | q11 - q25       | 55002923   | 134373617 | 1780        | 0.392  | 0.000  | 79.4      | gDNA                 | n.a.                    |
| chr11        | q11             | 56098684   | 56294673  | 4           | 3.188  | 0.000  | 0.2       | 7                    | Ampli1                  |
| chr11        | q12.1 - q25     | 56850037   | 134160011 | 1747        | 0.391  | 0.000  | 77.3      | 9                    | Ampli1                  |
| chr11        | q12.1 - q13.5   | 58983477   | 76572286  | 574         | 0.888  | 0.000  | 17.6      | 4                    | GenomePlex              |
| chr11        | q12.2 - q13.4   | 60634209   | 73593084  | 449         | 0.617  | 0.000  | 13.0      | 6                    | Ampli1                  |
| chr11        | q12.2 - q13.4   | 60805584   | 72157759  | 406         | 0.728  | 0.000  | 11.4      | 9                    | Ampli1                  |
| chr11        | q12.2 - q25     | 60926740   | 133781718 | 1625        | 0.304  | 0.000  | 72.9      | 8                    | Ampli1                  |



| Chromosome # | Cytoband        | Aberration |           |             | Sample |        |           | Amplification method |                         |
|--------------|-----------------|------------|-----------|-------------|--------|--------|-----------|----------------------|-------------------------|
|              |                 | Start      | Stop      | # of probes | Amp    | Del    | size (Mb) |                      | (# of cell/genomic DNA) |
| chr11        | q12.3 - q25     | 61443364   | 133720992 | 1602        | 0.725  | 0.000  | 72.3      | 2                    | GenomePlex              |
| chr11        | q12.3 - q25     | 62894164   | 133720992 | 1550        | 0.279  | 0.000  | 70.8      | 10                   | Ampli1                  |
| chr11        | q13.4 - q24.3   | 71861247   | 130209175 | 1168        | 0.289  | 0.000  | 58.3      | 7                    | Ampli1                  |
| chr12        | p12.2 - p11.1   | 21152676   | 34236852  | 252         | 0.351  | 0.000  | 13.1      | gDNA                 | n.a.                    |
| chr12        | p12.1 - p11.1   | 21422844   | 33713511  | 237         | 0.389  | 0.000  | 12.3      | 7                    | Ampli1                  |
| chr12        | q12 - q24.33    | 43196437   | 132278059 | 1861        | 0.473  | 0.000  | 89.1      | 4                    | GenomePlex              |
| chr12        | q13.13 - q14.1  | 50214554   | 56396514  | 248         | 0.000  | -0.382 | 6.2       | 7                    | Ampli1                  |
| chr12        | q13.3 - q24.33  | 55348927   | 132031569 | 1478        | 0.599  | 0.000  | 76.7      | 1                    | GenomePlex              |
| chr12        | q14.1 - q23.2   | 56440283   | 101536818 | 743         | 0.000  | -0.267 | 45.1      | 9                    | Ampli1                  |
| chr12        | q14.1 - q23.2   | 56585353   | 100172938 | 696         | 0.000  | -0.351 | 43.6      | 6                    | Ampli1                  |
| chr12        | q23.2           | 100203668  | 101036489 | 26          | 1.575  | 0.000  | 0.8       | 7                    | Ampli1                  |
| chr12        | q23.2           | 100901079  | 100973914 | 3           | 3.702  | 0.000  | 0.1       | 5                    | Ampli1                  |
| chr12        | q24.11 - q24.33 | 107933407  | 131891124 | 527         | 0.000  | -0.322 | 24.0      | 7                    | Ampli1                  |
| chr13        | q11 - q13.3     | 18194544   | 37526008  | 408         | 0.339  | 0.000  | 19.3      | gDNA                 | n.a.                    |
| chr13        | q12.11 - q33.3  | 18424064   | 107032265 | 1566        | 0.000  | -0.731 | 88.6      | 1                    | GenomePlex              |
| chr13        | q12.11 - q33.2  | 18679724   | 104320727 | 1525        | 0.522  | 0.000  | 85.6      | 7                    | Ampli1                  |
| chr13        | q12.11 - q34    | 20358009   | 113532325 | 1660        | 0.000  | -0.802 | 93.2      | 3                    | GenomePlex              |
| chr13        | q12.12          | 23330135   | 23467340  | 3           | 3.732  | 0.000  | 0.1       | 5                    | Ampli1                  |
| chr13        | q12.12          | 23330135   | 23467340  | 3           | 3.875  | 0.000  | 0.1       | 7                    | Ampli1                  |
| chr13        | q12.13 - q12.2  | 26518031   | 26766211  | 7           | 2.877  | 0.000  | 0.2       | 7                    | Ampli1                  |
| chr13        | q22.1           | 72326167   | 73477139  | 26          | 1.798  | 0.000  | 1.2       | 7                    | Ampli1                  |
| chr14        | q11.2 - q32.33  | 19323579   | 106311914 | 1730        | 0.000  | -0.525 | 87.0      | gDNA                 | n.a.                    |
| chr14        | q11.2 - q32.33  | 19323579   | 106109254 | 1726        | 0.000  | -0.410 | 86.8      | 5                    | Ampli1                  |
| chr14        | q11.2 - q32.33  | 19408583   | 103376255 | 1658        | 0.000  | -0.819 | 84.0      | 3                    | GenomePlex              |
| chr14        | q11.2 - q32.33  | 19796936   | 106329869 | 1723        | 0.000  | -0.958 | 86.5      | 1                    | GenomePlex              |
| chr14        | q11.2 - q32.33  | 19869350   | 106109254 | 1713        | 0.000  | -0.455 | 86.2      | 7                    | Ampli1                  |
| chr14        | q11.2 - q32.33  | 19869350   | 103100647 | 1638        | 0.000  | -0.375 | 83.2      | 8                    | Ampli1                  |
| chr14        | q11.2 - q32.33  | 19918227   | 106160234 | 1712        | 0.000  | -0.366 | 86.2      | 10                   | Ampli1                  |
| chr14        | q11.2 - q32.2   | 20889193   | 99602032  | 1498        | 0.000  | -0.348 | 78.7      | 9                    | Ampli1                  |
| chr14        | q11.2 - q32.2   | 22722071   | 96018891  | 1390        | 0.000  | -0.619 | 73.3      | 2                    | GenomePlex              |
| chr14        | q12 - q32.31    | 23837514   | 101801956 | 1448        | 0.000  | -0.526 | 78.0      | 6                    | Ampli1                  |

| Chromosome # | Cytoband      | Aberration |           |             | Sample |        |           | Amplification method |                         |
|--------------|---------------|------------|-----------|-------------|--------|--------|-----------|----------------------|-------------------------|
|              |               | Start      | Stop      | # of probes | Amp    | Del    | size (Mb) |                      | (# of cell/genomic DNA) |
| chr15        | q11.1 - q26.3 | 18362555   | 100282878 | 1701        | 0.392  | 0.000  | 81.9      | gDNA                 | n.a.                    |
| chr15        | q11.1 - q26.3 | 18362555   | 100168718 | 1698        | 0.601  | 0.000  | 81.8      | 2                    | GenomePlex              |
| chr15        | q11.1 - q26.3 | 18362555   | 99831916  | 1689        | 0.345  | 0.000  | 81.5      | 5                    | Ampli1                  |
| chr15        | q11.2 - q26.3 | 18741716   | 99831916  | 1688        | 0.329  | 0.000  | 81.1      | 6                    | Ampli1                  |
| chr15        | q11.2 - q26.3 | 18741716   | 99831916  | 1688        | 0.393  | 0.000  | 81.1      | 9                    | Ampli1                  |
| chr15        | q11.2 - q26.3 | 18835660   | 100282878 | 1699        | 0.413  | 0.000  | 81.4      | 7                    | Ampli1                  |
| chr15        | q11.2 - q26.3 | 18863056   | 99999936  | 1689        | 0.348  | 0.000  | 81.1      | 8                    | Ampli1                  |
| chr15        | q11.2 - q26.3 | 18863056   | 100282878 | 1698        | 0.335  | 0.000  | 81.4      | 10                   | Ampli1                  |
| chr15        | q14           | 33837136   | 35854510  | 28          | 1.641  | 0.000  | 2.0       | 7                    | Ampli1                  |
| chr15        | q15.3         | 42580170   | 42642265  | 3           | 4.794  | 0.000  | 0.1       | 5                    | Ampli1                  |
| chr15        | q15.3         | 42580170   | 42642265  | 3           | 5.285  | 0.000  | 0.1       | 6                    | Ampli1                  |
| chr15        | q15.3 - q21.1 | 42580170   | 42797075  | 10          | 3.446  | 0.000  | 0.2       | 7                    | Ampli1                  |
| chr15        | q21.1         | 45459710   | 45688119  | 6           | 2.987  | 0.000  | 0.2       | 7                    | Ampli1                  |
| chr15        | q21.3 - q25.1 | 53700142   | 77395078  | 562         | 0.647  | 0.000  | 23.7      | 4                    | GenomePlex              |
| chr15        | q21.3         | 54108233   | 55070905  | 27          | 1.733  | 0.000  | 1.0       | 7                    | Ampli1                  |
| chr15        | q26.1         | 87238297   | 87256705  | 3           | 0.000  | -2.857 | 0.0       | 10                   | Ampli1                  |
| chr16        | p13.3 - p11.2 | 712555     | 34129822  | 744         | 0.653  | 0.000  | 33.4      | 4                    | GenomePlex              |
| chr16        | p13.2         | 6328649    | 6725667   | 12          | 0.000  | -2.507 | 0.4       | gDNA                 | n.a.                    |
| chr16        | p13.2         | 6328649    | 6725667   | 12          | 0.000  | -2.387 | 0.4       | 8                    | Ampli1                  |
| chr16        | p13.2         | 6367978    | 6725667   | 10          | 0.000  | -2.964 | 0.4       | 7                    | Ampli1                  |
| chr16        | p13.2         | 6367978    | 6725667   | 10          | 0.000  | -2.555 | 0.4       | 10                   | Ampli1                  |
| chr16        | p13.2         | 6406832    | 6492945   | 3           | 0.000  | -5.517 | 0.1       | gDNA                 | n.a.                    |
| chr16        | p13.2         | 6492886    | 6725667   | 6           | 0.000  | -3.620 | 0.2       | 5                    | Ampli1                  |
| chr16        | p13.2         | 6492886    | 6725667   | 6           | 0.000  | -3.613 | 0.2       | 6                    | Ampli1                  |
| chr16        | p13.2         | 6492886    | 6725667   | 6           | 0.000  | -3.465 | 0.2       | 9                    | Ampli1                  |
| chr16        | p13.2         | 6644617    | 6725667   | 4           | 0.000  | -4.572 | 0.1       | gDNA                 | n.a.                    |
| chr16        | p13.2         | 6821092    | 7322964   | 10          | 0.000  | -0.644 | 0.5       | gDNA                 | n.a.                    |
| chr16        | p12.3         | 19426488   | 19547492  | 5           | 2.696  | 0.000  | 0.1       | 7                    | Ampli1                  |
| chr16        | p12.1 - p11.1 | 24529935   | 34903000  | 208         | 0.000  | -0.402 | 10.4      | 7                    | Ampli1                  |
| chr16        | q11.2 - q24.3 | 45174916   | 88621982  | 997         | 0.590  | 0.000  | 43.4      | 4                    | GenomePlex              |
| chr16        | q12.1 - q12.2 | 51072014   | 52376121  | 27          | 1.365  | 0.000  | 1.3       | 7                    | Ampli1                  |

| Chromosome # | Cytoband        | Aberration |          |             | Sample |        |           | Amplification method |                         |
|--------------|-----------------|------------|----------|-------------|--------|--------|-----------|----------------------|-------------------------|
|              |                 | Start      | Stop     | # of probes | Amp    | Del    | size (Mb) |                      | (# of cell/genomic DNA) |
| chr16        | q13 - q24.3     | 55157063   | 88638764 | 803         | 0.276  | 0.000  | 33.5      | 9                    | Ampli1                  |
| chr16        | q21             | 57219863   | 58987235 | 23          | 1.280  | 0.000  | 1.8       | 5                    | Ampli1                  |
| chr16        | q21             | 57785182   | 58987235 | 13          | 2.773  | 0.000  | 1.2       | 7                    | Ampli1                  |
| chr16        | q23.1           | 77613911   | 77745538 | 4           | 0.000  | -1.463 | 0.1       | gDNA                 | n.a.                    |
| chr17        | p13.3 - p11.1   | 87009      | 22129948 | 601         | 0.000  | -0.423 | 22.0      | 5                    | Ampli1                  |
| chr17        | p13.3 - p11.1   | 87009      | 22129948 | 601         | 0.000  | -0.425 | 22.0      | 8                    | Ampli1                  |
| chr17        | p13.3 - p11.2   | 87009      | 21386319 | 596         | 0.000  | -0.750 | 21.3      | 7                    | Ampli1                  |
| chr17        | p13.3 - p11.1   | 148092     | 22129948 | 600         | 0.000  | -0.435 | 22.0      | gDNA                 | n.a.                    |
| chr17        | p13.3 - p11.2   | 756888     | 21857788 | 586         | 0.000  | -0.543 | 21.1      | 10                   | Ampli1                  |
| chr17        | p13.3 - p11.2   | 1315406    | 19866433 | 540         | 0.642  | 0.000  | 18.6      | 4                    | GenomePlex              |
| chr17        | q11.1 - q25.3   | 23134547   | 78623230 | 1540        | 0.717  | 0.000  | 55.5      | 4                    | GenomePlex              |
| chr17        | q11.2 - q25.3   | 23393985   | 77804425 | 1504        | 0.288  | 0.000  | 54.4      | 9                    | Ampli1                  |
| chr17        | q11.2 - q12     | 26284942   | 34360657 | 193         | 0.653  | 0.000  | 8.1       | gDNA                 | n.a.                    |
| chr17        | q11.2 - q21.2   | 26284942   | 36979959 | 300         | 0.414  | 0.000  | 10.7      | 5                    | Ampli1                  |
| chr17        | q11.2 - q21.2   | 26284942   | 37217631 | 309         | 0.364  | 0.000  | 10.9      | 8                    | Ampli1                  |
| chr17        | q11.2 - q21.32  | 26284942   | 43404016 | 533         | 0.424  | 0.000  | 17.1      | 6                    | Ampli1                  |
| chr17        | q12             | 29637473   | 34188999 | 108         | 0.520  | 0.000  | 4.6       | 10                   | Ampli1                  |
| chr17        | q12             | 33121121   | 34031410 | 10          | 1.310  | 0.000  | 0.9       | gDNA                 | n.a.                    |
| chr17        | q21.2 - q22     | 37134361   | 53773585 | 458         | 0.000  | -0.301 | 16.6      | 7                    | Ampli1                  |
| chr17        | q24.1 - q24.3   | 60370406   | 66340623 | 124         | 0.611  | 0.000  | 6.0       | 7                    | Ampli1                  |
| chr17        | q24.1 - q24.2   | 60744623   | 63719686 | 62          | 0.752  | 0.000  | 3.0       | gDNA                 | n.a.                    |
| chr17        | q24.3           | 66210775   | 68242871 | 24          | 0.000  | -0.553 | 2.0       | gDNA                 | n.a.                    |
| chr17        | q24.3 - q25.3   | 66421144   | 78300467 | 349         | 0.000  | -0.308 | 11.9      | 7                    | Ampli1                  |
| chr18        | p11.32 - p11.21 | 4316       | 14148122 | 270         | 0.422  | 0.000  | 14.1      | gDNA                 | n.a.                    |
| chr18        | p11.32 - p11.21 | 132096     | 14723870 | 273         | 0.336  | 0.000  | 14.6      | 10                   | Ampli1                  |
| chr18        | p11.32 - p11.21 | 2276141    | 13656290 | 221         | 0.500  | 0.000  | 11.4      | 7                    | Ampli1                  |
| chr18        | q11.1 - q23     | 16793851   | 76083117 | 968         | 0.000  | -0.479 | 59.3      | 7                    | Ampli1                  |
| chr18        | q11.1 - q23     | 16793851   | 76083117 | 968         | 0.000  | -0.393 | 59.3      | 8                    | Ampli1                  |
| chr18        | q11.1 - q22.3   | 16874053   | 70846966 | 880         | 0.000  | -0.793 | 54.0      | 3                    | GenomePlex              |
| chr18        | q11.1 - q23     | 16874053   | 75994936 | 965         | 0.000  | -0.492 | 59.1      | 5                    | Ampli1                  |
| chr18        | q11.1 - q23     | 16938683   | 73758157 | 923         | 0.000  | -0.457 | 56.8      | 9                    | Ampli1                  |

| Chromosome # | Cytoband        | Aberration |          |             | Sample |        |           | Amplification method |                         |
|--------------|-----------------|------------|----------|-------------|--------|--------|-----------|----------------------|-------------------------|
|              |                 | Start      | Stop     | # of probes | Amp    | Del    | size (Mb) |                      | (# of cell/genomic DNA) |
| chr18        | q11.1 - q23     | 16976046   | 75863450 | 960         | 0.000  | -0.659 | 58.9      | 6                    | Ampli1                  |
| chr18        | q11.1 - q23     | 17030723   | 75642167 | 953         | 0.000  | -1.067 | 58.6      | 1                    | GenomePlex              |
| chr18        | q11.2 - q23     | 17311108   | 75994936 | 954         | 0.000  | -0.372 | 58.7      | 10                   | Ampli1                  |
| chr18        | q11.2 - q23     | 17520584   | 76018409 | 949         | 0.000  | -0.608 | 58.5      | gDNA                 | n.a.                    |
| chr18        | q11.2 - q23     | 17520584   | 75004861 | 926         | 0.000  | -0.777 | 57.5      | 2                    | GenomePlex              |
| chr19        | p13.3 - p12     | 278273     | 24132581 | 873         | 0.000  | -0.348 | 23.9      | gDNA                 | n.a.                    |
| chr19        | p13.3 - p12     | 278273     | 22511226 | 849         | 0.000  | -0.401 | 22.2      | 8                    | Ampli1                  |
| chr19        | p13.3 - p12     | 278273     | 22303125 | 845         | 0.000  | -0.546 | 22.0      | 10                   | Ampli1                  |
| chr19        | p13.3 - p13.2   | 737550     | 10656335 | 378         | 1.021  | 0.000  | 9.9       | 4                    | GenomePlex              |
| chr19        | p13.3 - p12     | 774554     | 21768496 | 825         | 0.000  | -0.810 | 21.0      | 7                    | Ampli1                  |
| chr19        | p13.3 - p12     | 1428461    | 21880489 | 799         | 0.000  | -0.394 | 20.5      | 5                    | Ampli1                  |
| chr19        | q13.11 - q13.43 | 37780053   | 63161649 | 1030        | 0.327  | 0.000  | 25.4      | 5                    | Ampli1                  |
| chr19        | q13.11 - q13.43 | 37985252   | 63784382 | 1062        | 0.296  | 0.000  | 25.8      | 8                    | Ampli1                  |
| chr19        | q13.11 - q13.43 | 38106196   | 63784382 | 1057        | 0.550  | 0.000  | 25.7      | gDNA                 | n.a.                    |
| chr19        | q13.11 - q13.43 | 38131058   | 63784382 | 1055        | 0.604  | 0.000  | 25.7      | 6                    | Ampli1                  |
| chr19        | q13.11 - q13.43 | 38131058   | 63784382 | 1055        | 0.658  | 0.000  | 25.7      | 9                    | Ampli1                  |
| chr19        | q13.11 - q13.43 | 38156265   | 63342285 | 1024        | 0.922  | 0.000  | 25.2      | 2                    | GenomePlex              |
| chr19        | q13.2 - q13.33  | 43433697   | 56229403 | 544         | 0.930  | 0.000  | 12.8      | 4                    | GenomePlex              |
| chr20        | p12.1           | 14449723   | 15823849 | 27          | 0.000  | -1.189 | 1.4       | gDNA                 | n.a.                    |
| chr20        | p12.1           | 14939493   | 15046492 | 3           | 0.000  | -2.626 | 0.1       | 8                    | Ampli1                  |
| chr20        | p12.1           | 14939493   | 15046492 | 3           | 0.000  | -3.034 | 0.1       | 10                   | Ampli1                  |
| chr20        | p11.21 - p11.1  | 25227228   | 26135794 | 17          | 0.702  | 0.000  | 0.9       | gDNA                 | n.a.                    |
| chr20        | q11.21 - q13.33 | 29352138   | 62363633 | 757         | 0.728  | 0.000  | 33.0      | gDNA                 | n.a.                    |
| chr20        | q11.21 - q13.33 | 29352138   | 62363633 | 757         | 0.716  | 0.000  | 33.0      | 6                    | Ampli1                  |
| chr20        | q11.21 - q13.33 | 29352138   | 62134908 | 745         | 0.488  | 0.000  | 32.8      | 8                    | Ampli1                  |
| chr20        | q11.21 - q13.33 | 29352138   | 62363633 | 757         | 0.713  | 0.000  | 33.0      | 9                    | Ampli1                  |
| chr20        | q11.21 - q13.12 | 29440414   | 44181278 | 368         | 0.800  | 0.000  | 14.7      | 4                    | GenomePlex              |
| chr20        | q11.21 - q13.33 | 29454882   | 61785825 | 727         | 1.182  | 0.000  | 32.3      | 2                    | GenomePlex              |
| chr20        | q11.21 - q13.33 | 29657275   | 62194881 | 741         | 0.860  | 0.000  | 32.5      | 3                    | GenomePlex              |
| chr20        | q11.21 - q13.33 | 29692858   | 62213560 | 742         | 0.573  | 0.000  | 32.5      | 5                    | Ampli1                  |
| chr20        | q11.21 - q13.33 | 29977659   | 59035629 | 633         | 0.416  | 0.000  | 29.1      | 7                    | Ampli1                  |

| Chromosome # | Cytoband        | Aberration |          |             | Sample |        |           | Amplification method |                         |
|--------------|-----------------|------------|----------|-------------|--------|--------|-----------|----------------------|-------------------------|
|              |                 | Start      | Stop     | # of probes | Amp    | Del    | size (Mb) |                      | (# of cell/genomic DNA) |
| chr20        | q11.21 - q13.33 | 29997987   | 59035629 | 632         | 0.432  | 0.000  | 29.0      | 10                   | Ampli1                  |
| chr20        | q11.22 - q13.33 | 32101066   | 62363633 | 685         | 0.865  | 0.000  | 30.3      | 1                    | GenomePlex              |
| chr21        | q11.2 - q22.11  | 13562263   | 34477354 | 391         | 0.000  | -0.465 | 20.9      | 9                    | Ampli1                  |
| chr21        | q11.2 - q22.3   | 13956118   | 46811587 | 715         | 0.000  | -0.382 | 32.9      | 8                    | Ampli1                  |
| chr21        | q11.2 - q22.3   | 14092232   | 46892352 | 719         | 0.000  | -0.574 | 32.8      | gDNA                 | n.a.                    |
| chr21        | q11.2 - q22.3   | 14372903   | 46801599 | 710         | 0.000  | -0.424 | 32.4      | 10                   | Ampli1                  |
| chr21        | q11.2 - q22.3   | 14460851   | 46223019 | 685         | 0.000  | -0.992 | 31.8      | 1                    | GenomePlex              |
| chr21        | q11.2 - q22.3   | 14876312   | 46880878 | 703         | 0.000  | -0.324 | 32.0      | 6                    | Ampli1                  |
| chr21        | q21.1 - q22.3   | 18499175   | 46488180 | 617         | 0.000  | -0.325 | 28.0      | 5                    | Ampli1                  |
| chr21        | q22.11 - q22.3  | 31374122   | 46801599 | 409         | 0.000  | -0.451 | 15.4      | 7                    | Ampli1                  |
| chr22        | q11.1 - q11.21  | 15476855   | 17021468 | 34          | 0.000  | -0.431 | 1.5       | gDNA                 | n.a.                    |
| chr22        | q11.21          | 17299942   | 19712953 | 74          | 0.882  | 0.000  | 2.4       | 9                    | Ampli1                  |
| chr22        | q11.21          | 17364460   | 19605314 | 64          | 0.736  | 0.000  | 2.2       | gDNA                 | n.a.                    |
| chr22        | q11.21          | 17403824   | 19432006 | 59          | 0.897  | 0.000  | 2.0       | 5                    | Ampli1                  |
| chr22        | q11.21          | 17809644   | 19125851 | 36          | 0.843  | 0.000  | 1.3       | 8                    | Ampli1                  |
| chr22        | q11.21          | 17964758   | 19432006 | 36          | 1.516  | 0.000  | 1.5       | 6                    | Ampli1                  |
| chr22        | q11.21 - q13.33 | 19653161   | 49525130 | 799         | 0.000  | -0.681 | 29.9      | 7                    | Ampli1                  |
| chr22        | q11.21 - q13.33 | 19674757   | 49525130 | 798         | 0.000  | -0.380 | 29.9      | gDNA                 | n.a.                    |
| chr22        | q11.21 - q13.33 | 19674757   | 49034395 | 781         | 0.000  | -0.460 | 29.4      | 10                   | Ampli1                  |
| chr22        | q12.1 - q12.2   | 26828859   | 28611320 | 54          | 0.482  | 0.000  | 1.8       | gDNA                 | n.a.                    |
| chr22        | q12.1 - q12.2   | 26839313   | 28611320 | 53          | 0.295  | 0.000  | 1.8       | 7                    | Ampli1                  |
| chr22        | q12.1 - q12.2   | 26839313   | 28683083 | 54          | 0.384  | 0.000  | 1.8       | 10                   | Ampli1                  |
| chr22        | q12.2 - q13.32  | 28683025   | 47672822 | 519         | 0.000  | -0.418 | 19.0      | 8                    | Ampli1                  |
| chr22        | q12.2 - q13.33  | 28683025   | 49034395 | 552         | 0.000  | -0.423 | 20.4      | 5                    | Ampli1                  |



| Chromosome # | GenomePlex-based amplification |       |               |       | Ampli1-based amplification |       |       |               |       |       |
|--------------|--------------------------------|-------|---------------|-------|----------------------------|-------|-------|---------------|-------|-------|
|              | Non-C&R treatment              |       | C&R treatment |       | Non-C&R treatment          |       |       | C&R treatment |       |       |
|              | #1                             | #2    | #3            | #4    | #5                         | #6    | #7    | #8            | #9    | #10   |
| 7            |                                |       |               |       |                            |       | 10.15 |               |       |       |
|              |                                |       |               |       |                            |       | 2.68  |               |       |       |
|              |                                |       |               |       |                            |       | 1.14  |               |       |       |
|              |                                |       |               |       |                            |       | 0.47  |               |       |       |
|              |                                |       |               |       |                            |       | 0.35  |               |       |       |
|              |                                |       |               |       |                            |       | 0.34  |               |       |       |
|              |                                |       |               |       |                            |       | 0.20  |               |       |       |
|              |                                |       |               |       |                            |       | 0.16  |               |       |       |
|              |                                |       |               |       |                            |       | 0.12  |               |       |       |
|              |                                |       |               |       |                            | 0.05  |       |               |       |       |
| 8            | 43.08                          | 43.17 | 43.24         | 91.39 | 43.17                      | 58.87 | 43.24 | 43.24         | 42.47 | 43.24 |
|              | 27.48                          | 28.31 | 32.01         |       | 27.34                      | 43.02 | 27.19 | 27.34         | 27.98 | 27.34 |
|              |                                |       |               |       | 0.08                       | 27.93 | 0.26  | 0.08          | 0.08  |       |
|              |                                |       |               |       |                            | 0.08  | 0.21  |               |       |       |
|              |                                |       |               |       |                            | 0.08  |       |               |       |       |
| 9            |                                |       |               |       |                            | 29.01 | 26.05 |               | 10.88 | 5.07  |
|              |                                |       |               |       |                            |       | 6.70  |               |       |       |
|              |                                |       |               |       |                            |       | 0.35  |               |       |       |
|              |                                |       |               |       |                            |       | 0.05  |               |       |       |
| 10           |                                |       |               | 51.15 |                            |       | 18.83 |               |       |       |
|              |                                |       |               |       |                            |       | 11.67 |               |       |       |
|              |                                |       |               |       |                            |       | 5.40  |               |       |       |
|              |                                |       |               |       |                            |       | 0.11  |               |       |       |
| 11           |                                | 72.28 | 73.53         | 49.88 | 78.85                      | 12.96 | 58.35 | 72.85         | 77.31 | 70.83 |
|              |                                |       |               | 17.59 |                            |       | 31.32 |               | 11.35 |       |
|              |                                |       |               |       |                            |       | 0.20  |               |       |       |
| 12           | 76.68                          |       |               | 89.08 | 0.07                       | 43.59 | 23.96 |               | 45.10 |       |
|              |                                |       |               |       |                            |       | 12.29 |               |       |       |
|              |                                |       |               |       |                            |       | 6.18  |               |       |       |
|              |                                |       |               |       |                            |       | 0.83  |               |       |       |
| 13           | 88.61                          |       | 93.17         |       | 0.14                       |       | 85.64 |               |       |       |
|              |                                |       |               |       |                            |       | 1.15  |               |       |       |
|              |                                |       |               |       |                            |       | 0.25  |               |       |       |
|              |                                |       |               |       |                            |       | 0.14  |               |       |       |
| 14           | 86.53                          | 73.30 | 83.97         |       | 86.79                      | 77.96 | 86.24 | 83.23         | 78.71 | 86.24 |
| 15           |                                | 81.81 |               | 23.69 | 81.47                      | 81.09 | 81.45 | 81.14         | 81.09 | 81.42 |
|              |                                |       |               |       | 0.06                       | 0.06  | 2.02  |               |       | 0.02  |
|              |                                |       |               |       |                            |       | 0.96  |               |       |       |
|              |                                |       |               |       |                            |       | 0.23  |               |       |       |
|              |                                |       |               |       |                            | 0.22  |       |               |       |       |
| 16           |                                |       |               | 43.45 | 1.77                       | 0.23  | 10.37 | 0.40          | 33.48 | 0.36  |
|              |                                |       |               | 33.42 | 0.23                       |       | 1.30  |               | 0.23  |       |
|              |                                |       |               |       |                            |       | 1.20  |               |       |       |
|              |                                |       |               |       |                            |       | 0.36  |               |       |       |
|              |                                |       |               |       |                            | 0.12  |       |               |       |       |
| 17           |                                |       |               | 55.49 | 22.04                      | 17.12 | 21.30 | 22.04         | 54.41 | 21.10 |

| Chromosome # | GenomePlex-based amplification |       |               |       | Ampli1-based amplification |       |       |               |       |       |
|--------------|--------------------------------|-------|---------------|-------|----------------------------|-------|-------|---------------|-------|-------|
|              | Non-C&R treatment              |       | C&R treatment |       | Non-C&R treatment          |       |       | C&R treatment |       |       |
|              | #1                             | #2    | #3            | #4    | #5                         | #6    | #7    | #8            | #9    | #10   |
| 17           |                                |       |               | 18.55 | 10.70                      |       | 16.64 | 10.93         |       | 4.55  |
|              |                                |       |               |       |                            |       | 11.88 |               |       |       |
|              |                                |       |               |       |                            |       | 5.97  |               |       |       |
| 18           | 58.61                          | 57.48 | 53.97         |       | 59.12                      | 58.89 | 59.29 | 59.29         | 56.82 | 58.68 |
|              |                                |       |               |       |                            |       | 11.38 |               |       | 14.59 |
| 19           |                                | 25.19 |               | 12.80 | 25.38                      | 25.65 | 20.99 | 25.80         | 25.65 | 22.02 |
|              |                                |       |               | 9.92  | 20.45                      |       |       | 22.23         |       |       |
| 20           | 30.26                          | 32.33 | 32.54         | 14.74 | 32.52                      | 33.01 | 29.06 | 32.78         | 33.01 | 29.04 |
|              |                                |       |               |       |                            |       |       | 0.11          |       | 0.11  |
| 21           | 31.76                          |       |               |       | 27.99                      | 32.00 | 15.43 | 32.86         | 20.92 | 32.43 |
| 22           |                                |       |               |       | 20.35                      | 1.47  | 29.87 | 18.99         | 2.41  | 29.36 |
|              |                                |       |               |       | 2.03                       |       | 1.77  | 1.32          |       | 1.84  |



**Supplementary Table S5.** Ampli1 CHPCustom Beta panel target gene list

| Chromosomes | Genes          | Amplicon # | Hotspot # |
|-------------|----------------|------------|-----------|
| chr9        | <i>ABL1</i>    | 5          | 19        |
| chr2        | <i>ALK</i>     | 1          | 1         |
| chr11       | <i>ATM</i>     | 9          | 13        |
| chr16       | <i>CDH1</i>    | 3          | 4         |
| chr5        | <i>CSF1R</i>   | 2          | 8         |
| chr7        | <i>EGFR</i>    | 7          | 71        |
| chr2        | <i>ERBB4</i>   | 4          | 7         |
| chr4        | <i>FBXW7</i>   | 3          | 23        |
| chr10       | <i>FGFR2</i>   | 3          | 5         |
| chr13       | <i>FLT3</i>    | 4          | 30        |
| chr20       | <i>GNAS</i>    | 2          | Dataset12 |
| chr2        | <i>IDH1</i>    | 1          | 15        |
| chr19       | <i>JAK3</i>    | 3          | 6         |
| chr4        | <i>KIT</i>     | 6          | 114       |
| chr7        | <i>MET</i>     | 3          | 6         |
| chr1        | <i>MPL</i>     | 1          | 10        |
| chr1        | <i>NRAS</i>    | 3          | 35        |
| chr3        | <i>PIK3CA</i>  | 5          | 60        |
| chr12       | <i>PTPN11</i>  | 2          | 28        |
| chr10       | <i>RET</i>     | 2          | 4         |
| chr22       | <i>SMARCB1</i> | 3          | 10        |
| chr2        | <i>SRC</i>     | 1          | 1         |
| chr17       | <i>TP53</i>    | 8          | 1147      |
| chr14       | <i>AKT1</i>    | 2          | 6         |
| chr5        | <i>APC</i>     | 2          | 17        |
| chr7        | <i>BRAF</i>    | 2          | 77        |
| chr9        | <i>CDKN2A</i>  | 2          | 97        |
| chr3        | <i>CTNNB1</i>  | 1          | 73        |
| chr17       | <i>ERBB2</i>   | 4          | 19        |
| chr7        | <i>EZH2</i>    | 1          | 11        |
| chr8        | <i>FGFR1</i>   | 2          | 2         |
| chr4        | <i>FGFR3</i>   | 5          | 17        |
| chr19       | <i>GNA11</i>   | 1          | 5         |
| chr12       | <i>HNF1A</i>   | 2          | 10        |
| chr15       | <i>IDH2</i>    | 1          | 12        |
| chr4        | <i>KDR</i>     | 6          | 8         |
| chr12       | <i>KRAS</i>    | 3          | 63        |
| chr3        | <i>MLH1</i>    | 1          | 1         |
| chr9        | <i>NOTCH1</i>  | 3          | 20        |
| chr4        | <i>PDGFRA</i>  | 4          | 26        |
| chr10       | <i>PTEN</i>    | 2          | 55        |
| chr13       | <i>RB1</i>     | 4          | 9         |
| chr18       | <i>SMAD4</i>   | 4          | 13        |
| chr7        | <i>SMO</i>     | 4          | 4         |
| chr19       | <i>STK11</i>   | 4          | 23        |
| chr3        | <i>HVHL</i>    | 2          | 68        |
